# Supplementary material for: Levels of donor‐derived cell‐free DNA and chemokines in BK polyomavirus‐associated nephropathy
Source: PubMed Central journal article supplement — Clin Transplant. 2022 Aug 5;36(11):e14785. doi: 10.1111/ctr.14785 (PMC10078585; doi:10.1111/ctr.14785), 2022-08-05
Supplement: CTR-36-0-s001.pdf [file CTR-36-0-s001.pdf]

## **Supplemental Material**

### **Levels of Donor-Derived Cell-free DNA and Chemokines in BK Polyomavirus-Associated Nephropathy**

Katharina A. Mayer, Haris Omic, Lukas Weseslindtner, Konstantin Doberer, Roman Reindl-Schwaighofer, Thierry Viard, Amanda Tillgren, Susanne Haindl, Silvia Casas, Farsad Eskandary, Andreas Heinzl, Nicolas Kozakowski, Željko Kikić, Georg A. Böhmig, Michael Eder

**Supplemental Table 1. Baseline characteristics of renal allograft recipients with BKPyVAN**

| Variables                                    | Patients with BKPyVAN                                            |                                                                    | P-value |
|----------------------------------------------|------------------------------------------------------------------|--------------------------------------------------------------------|---------|
|                                              | Study inclusion<br>N=19                                          | No study inclusion<br>n=16                                         |         |
| <b>Variables recorded at transplantation</b> |                                                                  |                                                                    |         |
| Female sex, n (%)                            | 4 (21.1)                                                         | 6 (37.5)                                                           | 0.45    |
| Recipient age (years), median (IQR)          | 62 (48-75)                                                       | 53 (48-59)                                                         | 0.08    |
| Deceased donor, n (%)                        | 18 (94.7)                                                        | 9 (56.3)                                                           | 0.013   |
| Prior kidney transplant, n (%)               | 1 (5.3)                                                          | 2 (12.5)                                                           | 0.58    |
| Prefomed anti-HLA DSA, n (%) <sup>a</sup>    | 2 (10.5)                                                         | 2 (12.5)                                                           | >0.99   |
| Donor age (years), median (IQR)              | 57 (48-70)                                                       | 61 (54-69)                                                         | 0.52    |
| HLA mismatch (A, B, DR), median (IQR)        | 4 (2-4)                                                          | 3 (1-3)                                                            | 0.16    |
| Initial immunosuppression                    |                                                                  |                                                                    |         |
| IL-2 receptor antibody induction, n (%)      | 17 (89.5)                                                        | 13 (81.3)                                                          | 0.64    |
| Tacrolimus-based therapy, n (%)              | 19 (100)                                                         | 15 (93.8)                                                          | 0.46    |
| Peri-transplant immunoadsorption, n (%)      | 2 (10.5)                                                         | 5 (31.3)                                                           | 0.21    |
| <b>Variables recorded at index biopsy</b>    |                                                                  |                                                                    |         |
| Years after transplantation, median (IQR)    | 0.4 (0.3-0.5)                                                    | 0.4 (0.3-1.1)                                                      | 0.78    |
| Renal parameters, median (IQR)               |                                                                  |                                                                    |         |
| eGFR (ml/min/1.73m <sup>2</sup> )            | 35.6 (24.2-44.9)                                                 | 37.3 (31.2-45.0)                                                   | 0.66    |
| Urinary protein/creatinine ratio (mg/g)      | 330 (192-487)                                                    | 175 (130-245)                                                      | 0.015   |
| Maintenance immunosuppression                |                                                                  |                                                                    |         |
| Triple immunosuppression, n (%)              | 16 (94.1) <sup>b</sup>                                           | 16 (100)                                                           | >0.99   |
| Tacrolimus, n (%)                            | 18 (100) <sup>b</sup>                                            | 15 (93.8)                                                          | 0.47    |
| MPA, n (%)                                   | 16 (88.9) <sup>b</sup>                                           | 15 (93.8)                                                          | 0.62    |
| Steroids, n (%)                              | 18 (100) <sup>b</sup>                                            | 16 (100)                                                           | >0.99   |
| Biopsy results                               |                                                                  |                                                                    |         |
| Single lesion scores                         |                                                                  |                                                                    |         |
| i, median (IQR)                              | 1 (0-2)                                                          | 1 (0-2)                                                            | 0.39    |
| t, median (IQR)                              | 2 (2-3)                                                          | 2 (0-2)                                                            | 0.044   |
| ti, median (IQR)                             | 2 (1-3)                                                          | 2 (1-2)                                                            | 0.18    |
| ci, median (IQR)                             | 2 (1-3)                                                          | 2 (0-3)                                                            | 0.39    |
| ct, median (IQR)                             | 1 (0-2)                                                          | 1 (0-2)                                                            | >0.99   |
| SV 40 positivity, n (%)                      | 19 (100)                                                         | 16 (100)                                                           | >0.99   |
| BKPyV DNAemia (copies/ml), median (IQR)      | 2.4x10 <sup>4</sup><br>(1x10 <sup>4</sup> -1.2x10 <sup>5</sup> ) | 3.6x10 <sup>4</sup><br>(1.8x10 <sup>3</sup> -1.1x10 <sup>5</sup> ) | 0.49    |

BKPy, BK polyoma virus; BKPyVAN, BK polyomavirus-associated nephropathy; DSA, donor-specific antibody; eGFR, estimated glomerular filtration rate; HLA, human leukocyte antigen; IQR, interquartile range; MPA, mycophenolic acid.

<sup>b</sup>For one subject, no data on maintenance immunosuppression were available.

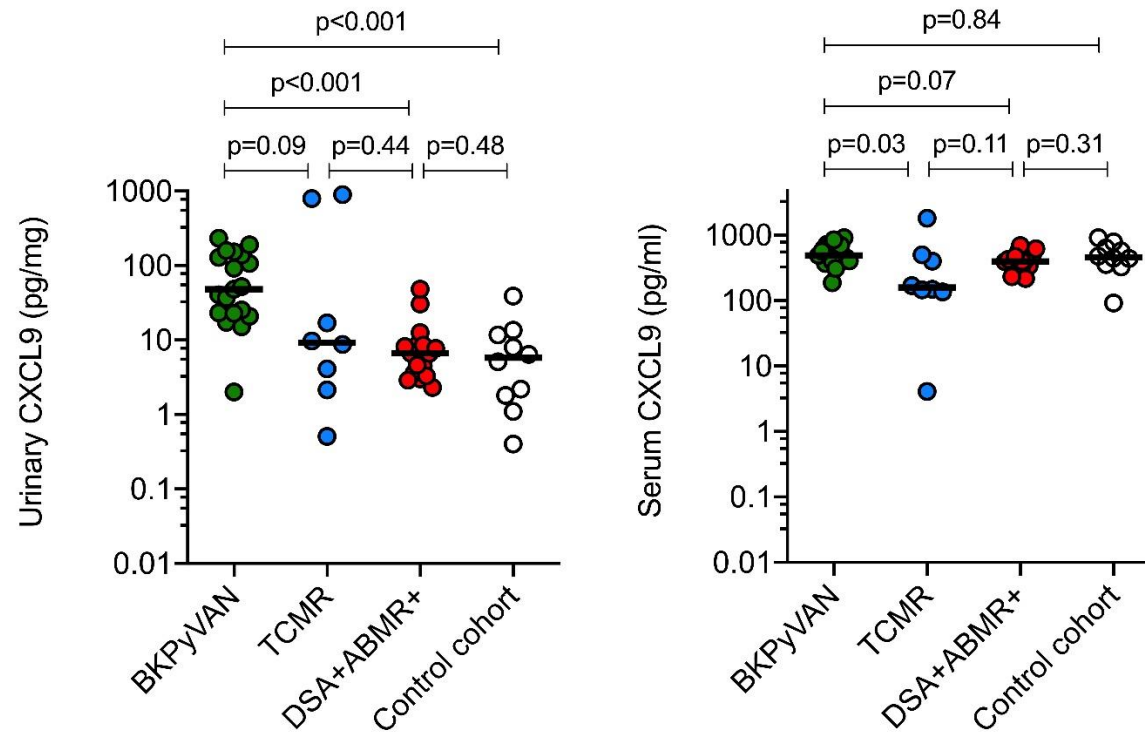

**Supplemental Figure 1.** Levels of urinary and serum CXCL9 at the time of the index biopsy. Horizontal lines indicate median values. For group comparisons, the Mann-Whitney U test was applied. ABMR, antibody-mediated rejection; BKPyVAN, BK polyomavirus-associated nephropathy; CXCL9, C-X-C motif chemokine ligand 9; DSA, donor-specific antibodies; TCMR, T cell-mediated rejection

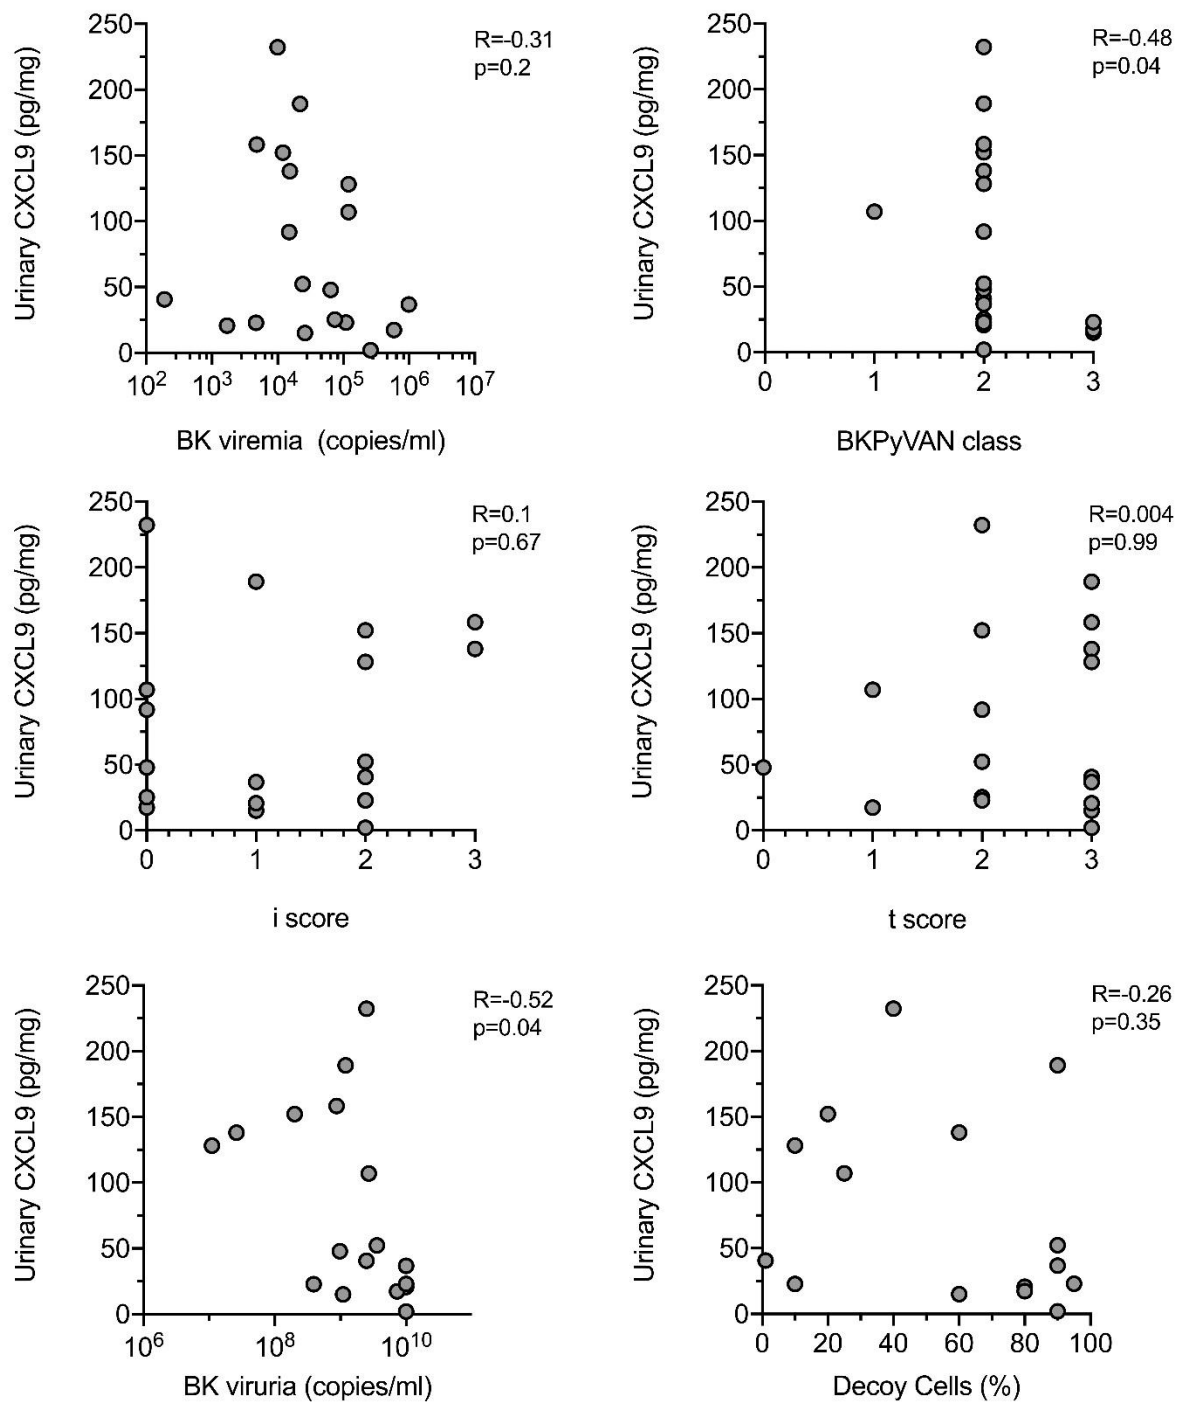

**Supplemental Figure 2.** Correlation between urinary CXCL9 levels and allograft histologic analysis or BKPy-specific biomarkers. Bivariate correlations were calculated using the Spearman coefficient. CXCL9, C-X-C motif chemokine ligand 9; dd-cfDNA, donor-derived cell-free DNA; BKPyVAN, BK polyomavirus-associated nephropathy.
